# Supplementary material
Source: MDPI journal article supplement (https://www.mdpi.com/2227-9040/7/2/27)
Supplement: s1 [file s1]

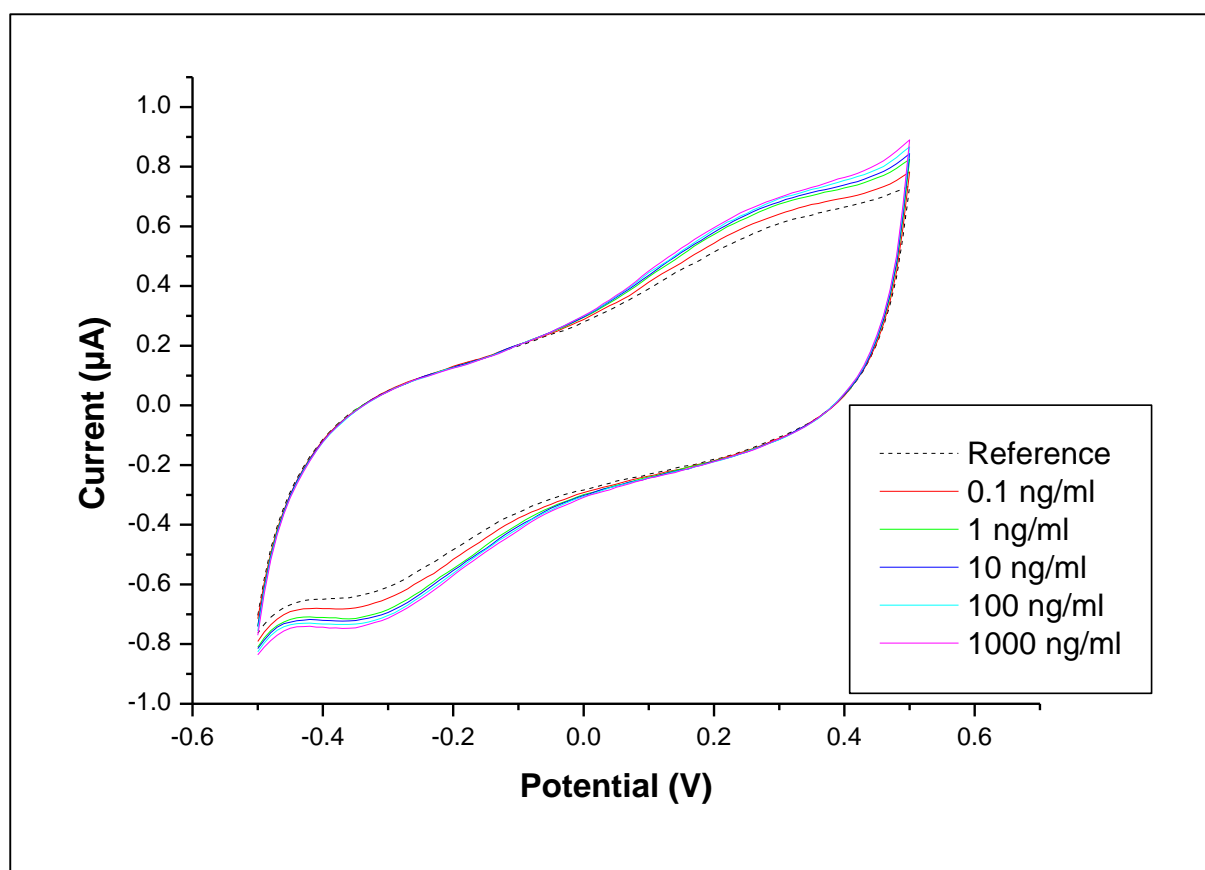

Figure S1. The series of CVs of samples with immobilized aptamers stored in the fridge for two to three week.
